# Supplementary material for: Fluorescence immunoassay for the targeted determination of traceListeria monocytogenesbased on immunomagnetic separation and CdZnTe quantum dot indication
Source: Royal Society of Chemistry journal article supplement (doi:10.1039/d1ay02106k), 2022-01-01
Supplement: d1ay02106k1.pdf [file d1ay02106k1.pdf]

## Supplementary Information

### Fluorescence immunoassay for targeted determination of trace *Listeria monocytogenes* based on immunomagnetic separation and CdZnTe quantum dots indication

Shan Liang, Li Ji, Yingying Zhong, Tiantian Wang, Huiyi Yang, Qing-Lan Li\*,  
Xiangguang Li\* and Suqing Zhao\*

*Department of Pharmaceutical Engineering, School of Biomedical and Pharmaceutical  
Sciences, Guangdong University of Technology, Guangzhou 510006, People's  
Republic of China*

#### \*Corresponding Author

Dr. Qing-Lan Li

E-mail addresses: [qli19@gdut.edu.cn](mailto:qli19@gdut.edu.cn)

Prof. Xiangguang Li

E-mail addresses: [xgl@gdut.edu.cn](mailto:xgl@gdut.edu.cn)

Prof. Suqing Zhao

E-mail addresses: [sqzhao@gdut.edu.cn](mailto:sqzhao@gdut.edu.cn)

#### E-mail addresses for other authors

[2111906111@mail2.gdut.edu.cn](mailto:2111906111@mail2.gdut.edu.cn) (Shan Liang), [grana233@163.com](mailto:grana233@163.com) (Ji  
Li), [gdutchemzyy@163.com](mailto:gdutchemzyy@163.com) (Yingying Zhong),  
[ttwang2314163620@163.com](mailto:ttwang2314163620@163.com) (Tiantian Wang), [iyihgnay@163.com](mailto:iyihgnay@163.com)  
(Huiyi Yang)

## 22 Evaluation of the anti-*L. monocytogenes* pAbs

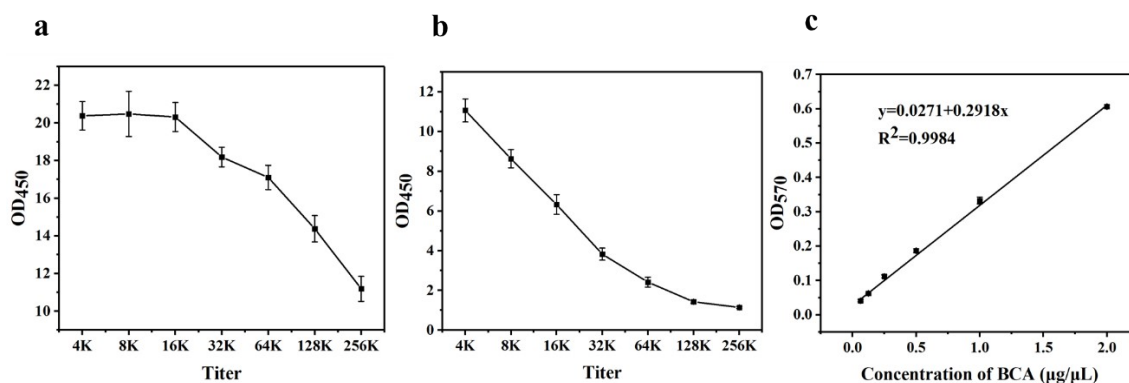

23

24 **Fig. S1.** The titer of the anti-*L. monocytogenes* (a) rabbit antibody and (b)  
25 guinea pig antibody after the fourth injection (n=3) by the method of  
26 iELISA method. (c) The standard protein curve of BCA. The concentration  
27 of anti-*L. monocytogenes* rabbit and guinea pig antibody is 10 µg/µL,  
28 respectively.

29

## 30 Characterization of Fe<sub>3</sub>O<sub>4</sub> NPs

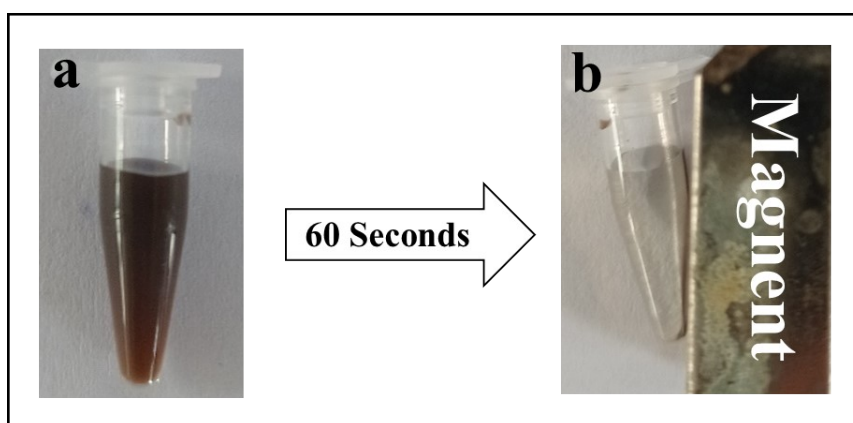

31

32 **Fig. S2.** Photographs of Fe<sub>3</sub>O<sub>4</sub> nanoparticles in water taken before (a) and  
33 after (b) magnetic separation.

34

35

### 36 Preparation of CdZnTe QDs and CdZnTe QDs/pAb2

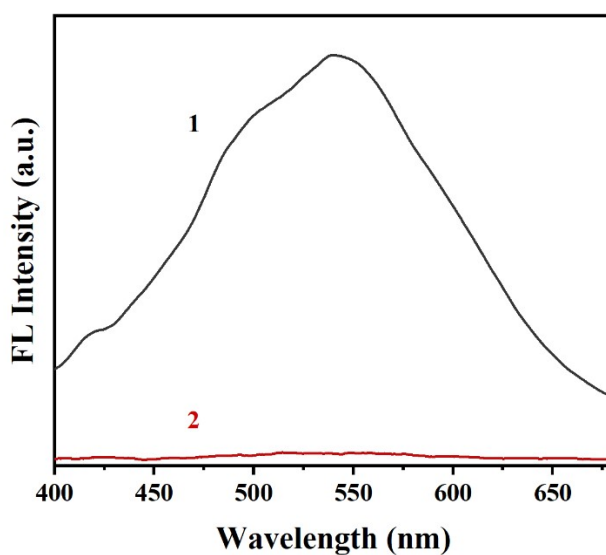

37

38 **Fig. S3.** Fluorescence spectra of CdZnTe QDs in deionized water (Line 1)  
39 and the supernatant of CdZnTe QDs after centrifugation (Line 2).

40

### 41 Optimization of the concentration ratio of Fe<sub>3</sub>O<sub>4</sub> NPs to pAb1 and 42 CdZnTe QDs to pAb2

43 To optimize the concentration ratio of Fe<sub>3</sub>O<sub>4</sub> NPs to pAb1, Fe<sub>3</sub>O<sub>4</sub> NPs (2.9  
44 mg mL<sup>-1</sup>) with different volumes (50, 100, 200, 300, 400, 500, 600 and 700  
45 μL) was mixed with 10 μL pAb1 (10.0 mg mL<sup>-1</sup>) and the mixture was  
46 stirred for 24 hours at 4 °C. After washing three times with PBS (10 mM,  
47 pH 7.4), Fe<sub>3</sub>O<sub>4</sub> NPs/pAb1 was collected with centrifuging at 10000  
48 rpm/min for 15 min. Then, the Fe<sub>3</sub>O<sub>4</sub> NPs/pAb1 was been added to HRP-  
49 goat anti-guinea pig secondary antibodies diluted 1: 5000 with PBS and  
50 cultivated at 37 °C for 1 hour. Finally, the mixture was washed three times  
51 under the same conditions as before and the optical density (OD) values at

52 a wavelength of 450 nm were measured by a Thermo Scientific microplate  
53 reader.

54 With the purpose to obtain the optimal concentration ratio of CdZnTe  
55 QDs to pAb2, 120 mg of EDC·HCl and 18 mg of NHS were mixed with  
56 CdZnTe QDs (5 mL, 6.9 mg mL<sup>-1</sup>) with vigorous shaking for 15 minutes  
57 at room temperature. After that, 10 μL of pAb2 (10.0 mg mL<sup>-1</sup>) was added  
58 into the above mixture with different volumes (50, 100, 200, 300, 400, 500  
59 and 600 μL) which was stirred for another 24 h at 4 °C. Finally, the  
60 obtained CdZnTe QDs/pAb2 were washed by centrifugation (10000 rpm,  
61 5 minutes) and dispersed in HRP-goat anti-rabbit secondary antibodies  
62 diluted 1: 5000 with PBS and cultivated at 37 °C for 1 hour. The optical  
63 density (OD) values at a wavelength of 450 nm were measured by a  
64 Thermo Scientific microplate reader.

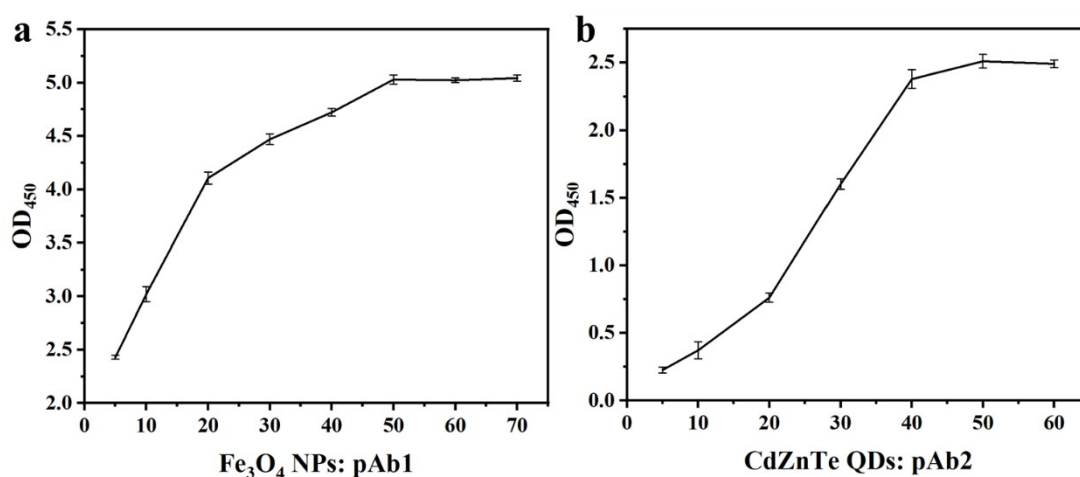

65  
66 **Fig. S4.** The optimization of volume ratio of Fe<sub>3</sub>O<sub>4</sub> NPs to pAb1 (a) and  
67 CdZnTe QDs to pAb2 (b).

68 As shown in Fig. S4, the OD value of the antigen-antibody complex

69 gradually increased with the volume ratio of  $\text{Fe}_3\text{O}_4$  NPs: pAb1 and CdZnTe  
70 QDs: pAb2, and plateaued starting at 50, respectively. The results indicated  
71 that the optimal volume ratio of  $\text{Fe}_3\text{O}_4$  NPs to pAb1 and CdZnTe QDs to  
72 pAb2 was 50. When the binding rate peaked, the binding site was filled up  
73 and no more coupling took place.

74

### 75 **The stability of the $\text{Fe}_3\text{O}_4$ NPs/ pAb1 and QDs/pAb2**

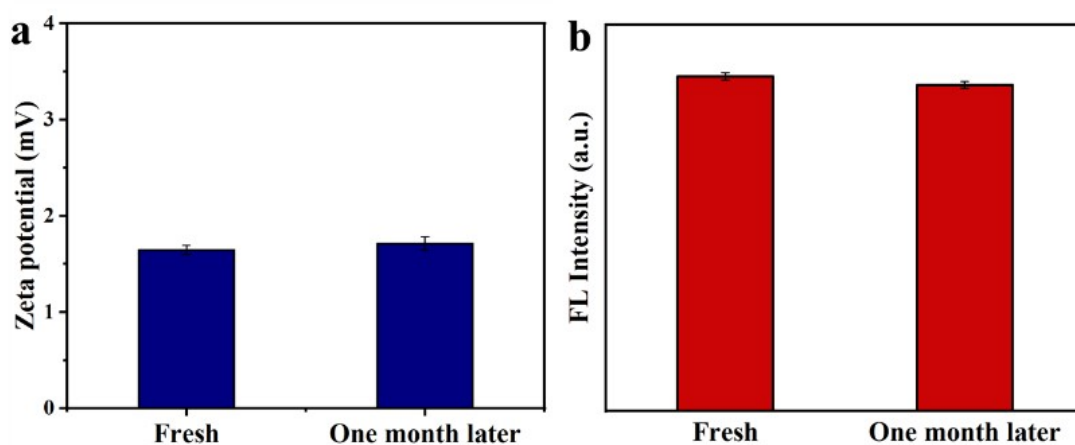

76

77 **Fig. S5.** The zeta potential (mV) of the  $\text{Fe}_3\text{O}_4$  NPs/pAb1 sample (a) and  
78 FL intensity of the CdZnTe QDs/pAb2 sample (b), freshly prepared and  
79 stored for one month, respectively.

80

81

82

83

84

85

## 86 Characterization of Fe<sub>3</sub>O<sub>4</sub> and Fe<sub>3</sub>O<sub>4</sub> NPs/pAb1

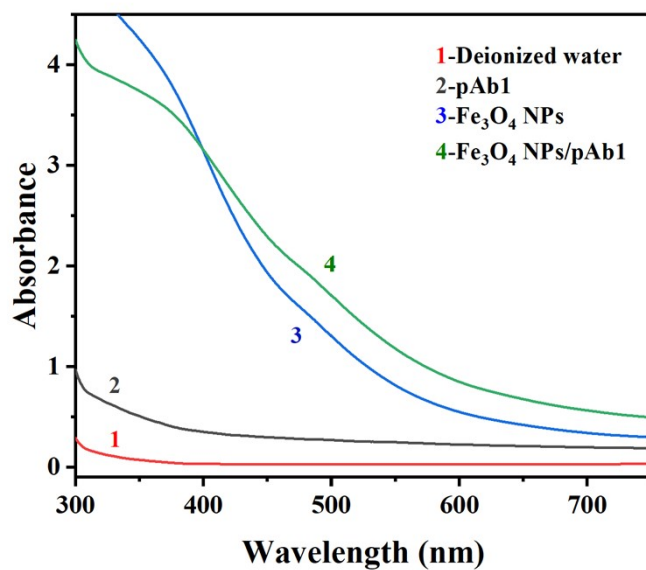

87

88 **Fig. S6.** UV-vis absorption spectra of the deionized water (line 1), the  
89 pAb1 (10.0 mg mL<sup>-1</sup>, line 2) and the Fe<sub>3</sub>O<sub>4</sub> NPs (2.725 mg mL<sup>-1</sup>, line 3)  
90 and the Fe<sub>3</sub>O<sub>4</sub> NPs/pAb1 (line 4).

91 As shown in Fig. S6, the UV-vis absorption spectra of the free pAb1, Fe<sub>3</sub>O<sub>4</sub>  
92 NPs and Fe<sub>3</sub>O<sub>4</sub> NPs/pAb1 exhibited no characteristic UV-vis peak.

## 93 Characterization of CdZnTe QDs and CdZnTe QDs/pAb2

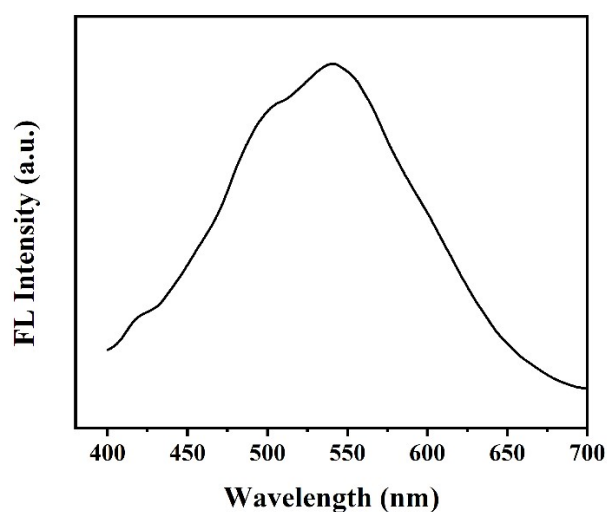

94

95 **Fig. S7.** Fluorescence spectrum of CdZnTe QDs/pAb2

96

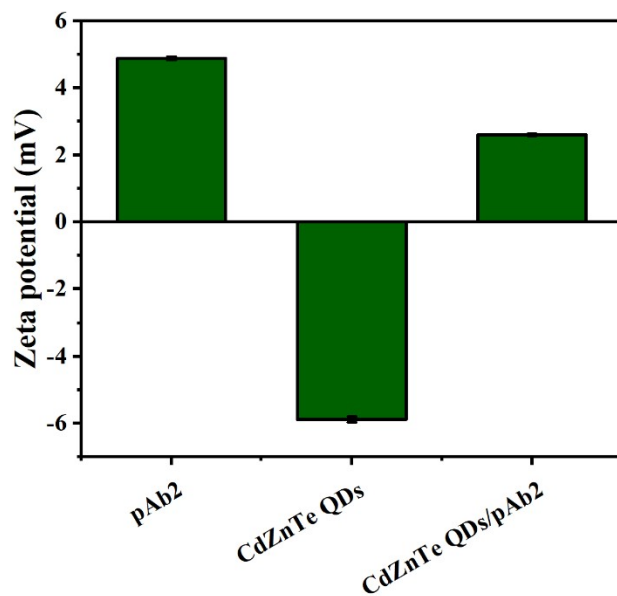

97

98 **Fig. S8.** Zeta potentials of the pAb2, the CdZnTe QDs and the CdZnTe  
99 QDs/ pAb2.
